# Supplementary material for: Molecular Characteristics and Genetic Evolution of Echovirus 33 in Mainland of China
Source: MDPI journal article supplement (doi:10.3390/pathogens11111379), 2022-11-18
Supplement: s1 [file s1]

## Supplementary materials

**Table S1.** Information of these 7 patients involved in this study.

| ID          | Gender | Age | Province | Collected time | Diagnosis              | clinical classification |
|-------------|--------|-----|----------|----------------|------------------------|-------------------------|
| 2013HUN-019 | female | 62  | HuNan    | 2013-06-26     | Influenza-like illness | /                       |
| 2013HUN-037 | male   | 7   | HuNan    | 2013-06-21     | HFMD                   | mild case               |
| 2015JS-087  | female | 1   | Jiangsu  | 2015-03-13     | HFMD                   | mild case               |
| 2015JS-088  | female | 2   | Jiangsu  | 2015-04-15     | HFMD                   | mild case               |
| 2015JS-089  | male   | 3   | Jiangsu  | 2015-03-31     | HFMD                   | mild case               |
| 2018XJ-113  | female | 6   | Xinjiang | 2018-05-22     | HFMD                   | mild case               |
| 2018XJ-115  | female | 5   | Xinjiang | 2018-06-17     | HFMD                   | mild case               |

**Table S2.** E33 full-length sequencing primers.

| Name      | Location  | Primer sequence(5'-3')                               | Orientation | Source     |
|-----------|-----------|------------------------------------------------------|-------------|------------|
| 0001S48   | -         | GGGGACAAGTTTGTACAAAAAAGCAGGCTTTAAAACA<br>GCTCTGGGGTT | Forward     | [22]       |
| EVP4      | 529-548   | CTACTTTGGGTGTCCGTGTT                                 | Forward     | [23]       |
| E33-871R  | 852-871   | CTATTGGCAGAATTCGATGC                                 | Reverse     | This study |
| E33-1071F | 1071-1090 | TATCTCAAGGACGACGAGGC                                 | Forward     | This study |
| OL68-1    | 1159-1178 | GGTAAYTTCCACCACCANCC                                 | Reverse     | [23]       |
| E33-1571F | 1571-1590 | TGCCTTACATCAACAGCGTC                                 | Forward     | This study |
| E33-1890R | 1871-1890 | ACTACCGAGTCCACTTCTGC                                 | Reverse     | This study |
| E33-2435F | 2435-2454 | GTACATGATGCTGTTGTTGG                                 | Forward     | This study |
| E33-2613R | 2594-2613 | TGTGCACATGCCTAGTTTGC                                 | Reverse     | This study |
| E33-3169F | 3169-3188 | CCGTTTCCAGTGTAGTGAGA                                 | Forward     | This study |
| E33-3273R | 3254-3273 | CCTGTTGTCATTAAATCCGC                                 | Reverse     | This study |
| E33-3950F | 3950-3969 | GACCTAATTACAGTGACCGC                                 | Forward     | This study |
| E33-4095R | 4076-4095 | GCGTTGGTCATCTCTGTGAA                                 | Reverse     | This study |
| E33-4656F | 4656-4675 | TAGTGTGACTTTGTACCGC                                  | Forward     | This study |
| E33-4924R | 4905-4924 | CTGGATGGCTTTGCCACATA                                 | Reverse     | This study |
| E33-5466F | 5466-5485 | AGA GTA CGG TGA ATT CAC GA                           | Forward     | This study |
| E33-5608R | 5589-5608 | TTGAGTTTCAGGAGTGTCAG                                 | Reverse     | This study |
| E33-6209F | 6209-6228 | ACAGCTAGCAACCTTAGACA                                 | Forward     | This study |
| E33-6427R | 6408-6427 | GATCGTAGTTCATCCTTCAC                                 | Reverse     | This study |
| E33-6609F | 6609-6628 | TGATTACAGTGGGTATGACG                                 | Forward     | This study |
| E33-6882R | 6853-6882 | CACCTTCAGCATTAGTGTTT                                 | Reverse     | This study |
| 7500 A    | -         | GGGGACCACTTTGTACAAGAAAGCTGGG(T)24                    | Reverse     | [22]       |

**Table S3.** 106 isolates used for phylogenetic analysis of E33.

| No | genotype | GenBank Accession | Sample ID          | Isolation Country | Isolation Year | Source     |
|----|----------|-------------------|--------------------|-------------------|----------------|------------|
| 1  | A        | AJ241436.1        | Toluca-3           | France            | 1959           | GeneBank   |
| 2  | B        | AY167758.1        | NEZ84-1967         | New-Zealand       | 1984           | GenBank    |
| 3  | B        | AY167759.1        | NEZ84-2723         | New-Zealand       | 1984           | GenBank    |
| 4  | B        | AY167760.1        | NEZ83-7709         | New-Zealand       | 1983           | GenBank    |
| 5  | B        | AY167761.1        | NEZ83-7776         | New-Zealand       | 1983           | GenBank    |
| 6  | B        | AY167762.1        | NEZ84-3401         | New-Zealand       | 1984           | GenBank    |
| 7  | B        | AY167763.1        | NEZ84-3303         | New-Zealand       | 1984           | GenBank    |
| 8  | C        | AY167764.1        | AK-30.04.00        | New-Zealand       | 2000           | GenBank    |
| 9  | C        | AY167765.1        | WHANG-03.09.00     | New-Zealand       | 2000           | GenBank    |
| 10 | C        | AY167766.1        | WK-29.04.00        | New-Zealand       | 2000           | GenBank    |
| 11 | C        | AY167767.1        | WK-18.04.00        | New-Zealand       | 2000           | GenBank    |
| 12 | C        | AY167768.1        | NL-13.05.00        | New-Zealand       | 2000           | GenBank    |
| 13 | C        | AY167769.1        | WK-25.03.00        | New-Zealand       | 2000           | GenBank    |
| 14 | C        | AY167770.1        | HU-11.08.00        | New-Zealand       | 2000           | GenBank    |
| 15 | C        | AY167771.1        | WK-05.05.00        | New-Zealand       | 2000           | GenBank    |
| 16 | C        | AY167772.1        | WK-04.05.00        | New-Zealand       | 2000           | GenBank    |
| 17 | C        | AY167773.1        | AK-19.05.00        | New-Zealand       | 2000           | GenBank    |
| 18 | C        | AY167774.1        | WK-18.04.00W       | New-Zealand       | 2000           | GenBank    |
| 19 | C        | AY167775.1        | AK-29.05.00        | New-Zealand       | 2000           | GenBank    |
| 20 | C        | AY167776.1        | WK-14.05.00        | New-Zealand       | 2000           | GenBank    |
| 21 | C        | AY167777.1        | HU-13.07.00        | New-Zealand       | 2000           | GenBank    |
| 22 | C        | AY167778.1        | AK-03.05.00        | New-Zealand       | 2000           | GenBank    |
| 23 | C        | AY167779.1        | WK-11.05.00        | New-Zealand       | 2000           | GenBank    |
| 24 | C        | AY167780.1        | WK-11.04.00        | New-Zealand       | 2000           | GenBank    |
| 25 | C        | AY167781.1        | WK-26.04.00        | New-Zealand       | 2000           | GenBank    |
| 26 | C        | AY167782.1        | AK-01.06.00        | New-Zealand       | 2000           | GenBank    |
| 27 | C        | AY167783.1        | HU-24.08.00        | New-Zealand       | 2000           | GenBank    |
| 28 | C        | AY167784.1        | WN-06.11.00        | New-Zealand       | 2000           | GenBank    |
| 29 | C        | AY167785.1        | WN-13.06.00        | New-Zealand       | 2000           | GenBank    |
| 30 | C        | AY167786.1        | WN-20.09.00        | New-Zealand       | 2000           | GenBank    |
| 31 | C        | AY167787.1        | WK-05.05.00W       | New-Zealand       | 2000           | GenBank    |
| 32 | C        | AY167788.1        | WK-30.04.00        | New-Zealand       | 2000           | GenBank    |
| 33 | C        | AY167789.1        | WK-06.10.00        | New-Zealand       | 2000           | GenBank    |
| 34 | C        | AY167790.1        | WK-28.08.00        | New-Zealand       | 2000           | GenBank    |
| 35 | C        | AY167791.1        | WK-29.04.00J       | New-Zealand       | 2000           | GenBank    |
| 36 | C        | AY167792.1        | WK-28.04.00        | New-Zealand       | 2000           | GenBank    |
| 37 | C        | AY167793.1        | WK-21.07.00        | New-Zealand       | 2000           | GenBank    |
| 38 | C        | AY167794.1        | WN-05.09.00        | New-Zealand       | 2000           | GenBank    |
| 39 | C        | AY167795.1        | AK-04.05.00        | New-Zealand       | 2000           | GenBank    |
| 40 | C        | AY167796.1        | NL-02.07.00        | New-Zealand       | 2000           | GenBank    |
| 41 | E        | KT965725.1        | YNK35/CHN/2013     | China             | 2013           | GenBank    |
| 42 | E        | KU379646.1        | YNA12/CHN/2013     | China             | 2013           | GenBank    |
| 43 | C        | ON873778          | 13019/HuN/CHN/2013 | China             | 2013           | This study |
| 44 | C        | ON873779          | 13037/HuN/CHN/2013 | China             | 2013           | This study |
| 45 | C        | ON873780          | 15087/JS/CHN/2015  | China             | 2013           | This study |
| 46 | C        | ON873781          | 15088/JS/CHN/2015  | China             | 2013           | This study |
| 47 | C        | ON87382           | 15089/JS/CHN/2015  | China             | 2013           | This study |
| 48 | C        | ON873783          | 18113/XJ/CHN/2018  | China             | 2018           | This study |
| 49 | C        | ON873784          | 18115/XJ/CHN/2018  | China             | 2018           | This study |
| 50 | C        | AM711014.1        | 234024-05          | France            | 2005           | GenBank    |
| 51 | C        | AY167797.1        | OMA98-0168         | Oman              | 1998           | GenBank    |
| 52 | C        | AY167798.1        | OMA98-0172         | Oman              | 1998           | GenBank    |
| 53 | C        | AY167799.1        | AUS96-2688         | Australia         | 1996           | GenBank    |
| 54 | C        | HF948113.1        | CF235069_FRA05     | France            | 2005           | GenBank    |
| 55 | D        | JN203971.1        | N-21               | India             | 2008           | GenBank    |
| 56 | D        | JN203972.1        | N-22               | India             | 2008           | GenBank    |
| 57 | C        | JN203973.1        | N-105              | India             | 2008           | GenBank    |
| 58 | C        | JN203974.1        | N-106              | India             | 2008           | GenBank    |
| 59 | C        | JN203975.1        | N-138              | India             | 2008           | GenBank    |
| 60 | D        | JN203977.1        | N-152A             | India             | 2008           | GenBank    |

|     |   |            |                   |          |      |         |
|-----|---|------------|-------------------|----------|------|---------|
| 61  | C | JN203978.1 | N-329             | India    | 2008 | GenBank |
| 62  | C | JN203979.1 | N-346             | India    | 2008 | GenBank |
| 63  | C | JN203981.1 | N-420             | India    | 2008 | GenBank |
| 64  | D | JN203982.1 | N-519             | India    | 2008 | GenBank |
| 65  | D | JN203983.1 | N-730             | India    | 2008 | GenBank |
| 66  | C | JN203984.1 | N-873             | India    | 2008 | GenBank |
| 67  | C | JN203985.1 | N-977             | India    | 2008 | GenBank |
| 68  | C | JN203986.1 | N-998             | India    | 2008 | GenBank |
| 69  | C | JN203987.1 | N-1029A           | India    | 2008 | GenBank |
| 70  | C | JN203989.1 | N-1058            | India    | 2008 | GenBank |
| 71  | C | JN203991.1 | N-1069            | India    | 2008 | GenBank |
| 72  | C | JN203992.1 | N-1071            | India    | 2008 | GenBank |
| 73  | C | JX513554.1 | A015D             | India    | 2008 | GenBank |
| 74  | C | JX513555.1 | A016D             | India    | 2008 | GenBank |
| 75  | C | JX513556.1 | A022D             | India    | 2008 | GenBank |
| 76  | C | JX513557.1 | A032D             | India    | 2008 | GenBank |
| 77  | C | JX513558.1 | A033D             | India    | 2008 | GenBank |
| 78  | C | JX513559.1 | A034D             | India    | 2008 | GenBank |
| 79  | C | JX513560.1 | KCD77-1           | India    | 2010 | GenBank |
| 80  | C | JX513561.1 | A93-22D           | India    | 2010 | GenBank |
| 81  | C | JX513562.1 | A107-18D          | India    | 2010 | GenBank |
| 82  | C | KF177104.1 | A78-34PI          | India    | 2010 | GenBank |
| 83  | C | KF177105.1 | A85-28PI          | India    | 2010 | GenBank |
| 84  | C | KF177106.1 | A91-20a           | India    | 2010 | GenBank |
| 85  | C | KF177107.1 | A94-19a           | India    | 2010 | GenBank |
| 86  | C | KF177108.1 | A103-18PI         | India    | 2010 | GenBank |
| 87  | C | KF177109.1 | A103-19PI         | India    | 2010 | GenBank |
| 88  | C | KF177110.1 | A108-18PD         | India    | 2010 | GenBank |
| 89  | C | KF512502.1 | ILIHuN13-1        | China    | 2013 | GenBank |
| 90  | C | KF512503.1 | ILIHuN13-2        | China    | 2013 | GenBank |
| 91  | C | KF512504.1 | ILIHuN13-3        | China    | 2013 | GenBank |
| 92  | C | KF512505.1 | ILIHuN13-4        | China    | 2013 | GenBank |
| 93  | C | KF512506.1 | ILIHuN13-5        | China    | 2013 | GenBank |
| 94  | C | KF512507.1 | ILIHuN13-6        | China    | 2013 | GenBank |
| 95  | C | KF512508.1 | ILIHuN13-7        | China    | 2013 | GenBank |
| 96  | C | KF512509.1 | ILIHuN13-8        | China    | 2013 | GenBank |
| 97  | C | KF512510.1 | ILIHuN13-9        | China    | 2013 | GenBank |
| 98  | C | KP638484.1 | HB92              | China    | 2014 | GenBank |
| 99  | C | KU574620.1 | PMKA1174/THA/2011 | Thailand | 2011 | GenBank |
| 100 | C | KU574640.1 | PMKA0914/THA/2010 | Thailand | 2010 | GenBank |
| 101 | C | LC120901.1 | 61-YN-CHN-2014JK  | China    | 2014 | GenBank |
| 102 | C | LC120903.1 | 62-YN-CHN-2014JK  | China    | 2014 | GenBank |
| 103 | C | LC120904.1 | 64-YN-CHN-2014JK  | China    | 2014 | GenBank |
| 104 | D | LC120942.1 | 65-YN-CHN-2014JK  | China    | 2015 | GenBank |
| 105 | C | LT883146.1 | 316-YN-CHN-2015JK | China    | 2017 | GenBank |
| 106 | D | MN018205.1 | P136/ZS/CHN/2010  | China    | 2010 | GenBank |

**Table S4.** Comparison of nucleotide sequence consistency between the representative strains of E and C genotypes and the prototype strains(AY302556.1\_Toluca-3) and other Enterovirus B group.

| Region | KU379646         |                         | KT965725         |                         | 2013HUN-19       |                         | 2015JS-87        |                         | 2018XJ-113       |                         |
|--------|------------------|-------------------------|------------------|-------------------------|------------------|-------------------------|------------------|-------------------------|------------------|-------------------------|
|        | E33<br>Prototype | Other EV-B<br>Prototype |
| 5'-UTR | 82               | 65.4-87                 | 81.5             | 65.1-86.5               | 82.4             | 66.4-88.8               | 81.8             | 65.6-87.9               | 82.1             | 66.1-88.5               |
| VP4    | 79.2             | 68.5-82.1               | 79.2             | 68.5-82.1               | 80.6             | 68.5-84                 | 80.6             | 67.1-82.6               | 78.7             | 67.6-84                 |
| VP2    | 78.9             | 64.5-72.7               | 77.5             | 64.4-71.5               | 78.5             | 64.9-71.2               | 77.7             | 65.1-71.7               | 78.2             | 64.9-72                 |
| VP3    | 78.4             | 62.7-72.8               | 78.4             | 62.3-72.6               | 79.4             | 63-71.8                 | 79.6             | 63-72.2                 | 78.7             | 61.9-70.8               |
| VP1    | 78.1             | 52.8-68.4               | 78.1             | 52.8-68.4               | 76.3             | 54.2-66.7               | 76.2             | 54-66.5                 | 76.2             | 54.7-67.4               |
| 2A     | 76.8             | 73.5-84.4               | 76.8             | 73.5-84.4               | 78               | 73.3-82.4               | 77.5             | 74-81.1                 | 78.4             | 73.3-81.3               |
| 2B     | 76               | 75-84.1                 | 76               | 75-84.1                 | 76.7             | 74.7-85.1               | 77.1             | 74.7-84.8               | 76.7             | 74.7-85.1               |
| 2C     | 80.8             | 78.9-84.3               | 80.9             | 79-84.4                 | 80.8             | 79.6-85.1               | 81               | 79.1-85.6               | 80.3             | 78.8-85.3               |
| 3A     | 77.9             | 71.9-79.7               | 81.2             | 74.5-82.7               | 79               | 74.9-84.2               | 78.6             | 74.9-84.2               | 77.9             | 74.9-84.6               |
| 3B     | 68.1             | 66.6-80.3               | 77.2             | 74.2-89.3               | 74.2             | 71.2-90.9               | 74.2             | 71.2-89.3               | 74.2             | 72.7-87.8               |
| 3C     | 79.2             | 74.6-81.9               | 80.8             | 76.6-84.1               | 77.5             | 75.5-84.6               | 76.3             | 75.4-85.2               | 77.4             | 74.6-84.8               |
| 3D     | 81.3             | 78.1-83.9               | 81.3             | 78.2-84                 | 79.2             | 78-86                   | 78.5             | 77-85.8                 | 78.7             | 77.7-86                 |
| 3'-UTR | 79.8             | 73.7-86.5               | 82.6             | 70.8-88.4               | 85.5             | 78.6-92.3               | 84.6             | 77.6-91.3               | 86.5             | 79.6-92.3               |

# P1 region

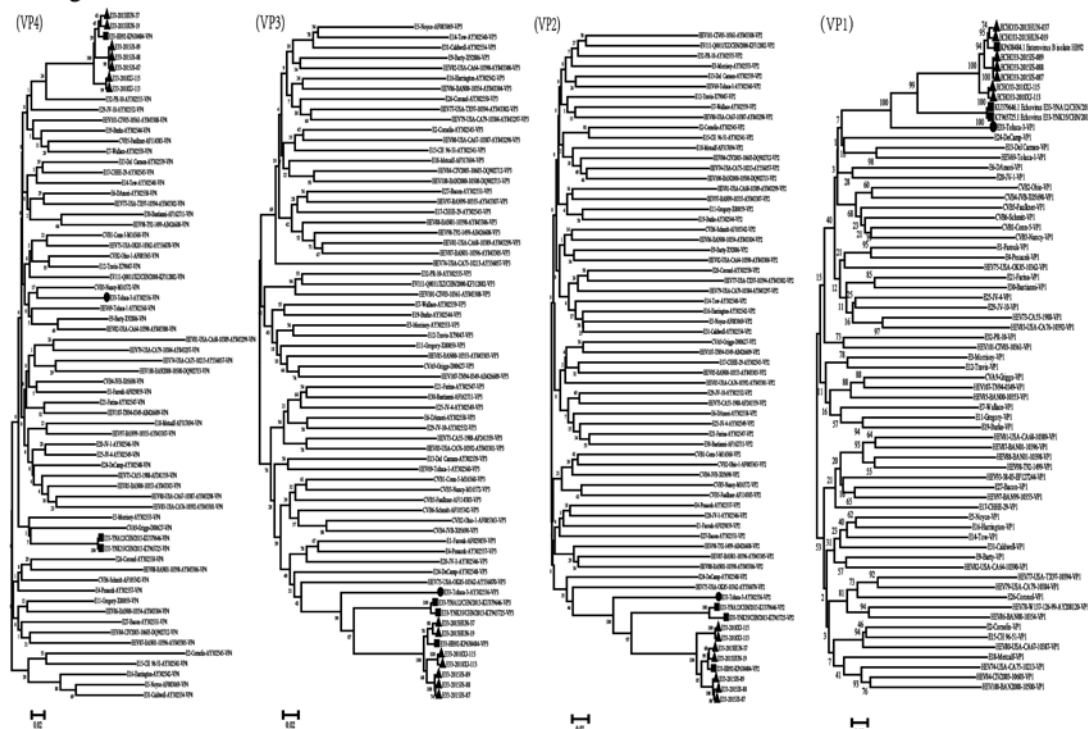

**Figure S1.** NJ trees based on *P1* regions of the prototype sequence of all *Enterovirus B* in the GenBank database and seven E33 strains in this study. ● indicates E33 prototype strain (Toluca-3); ▲ indicates 7 strains of E33 in this study ; ■ indicates represents other E33 strains in China. Numbers on codes indicate the bootstrap support of the node (1000 bootstrap replicate percentage). Scale bars represent the genetic distance, and all panels have the same scale. (VP4) VP4 region sequences; (VP3) VP3 region sequences; (VP2) VP2 region sequences; (VP1) VP1 region sequences.

## P2 region

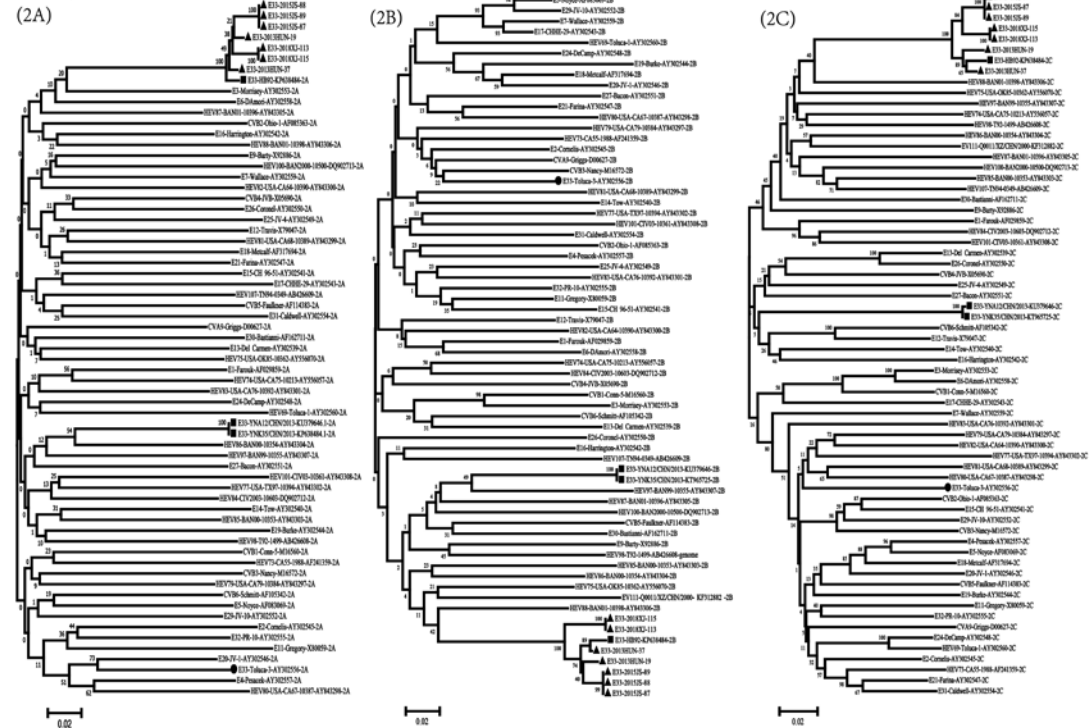

**Figure S2.** NJ trees based on P2 regions of the prototype sequence of all *Enterovirus B* in the GenBank database and seven E33 strains in this study. ● indicates E33 prototype strain (Toluca-3); ▲ indicates 7 strains of E33 in this study ; ■ indicates represents other E33 strains in China. Numbers on codes indicate the bootstrap support of the node (1000 bootstrap replicate percentage). Scale bars represent the genetic distance, and all panels have the same scale. (2A) 2A region sequences; (2B) 2B region sequences; (2C) 2C region sequences.

## P3 region

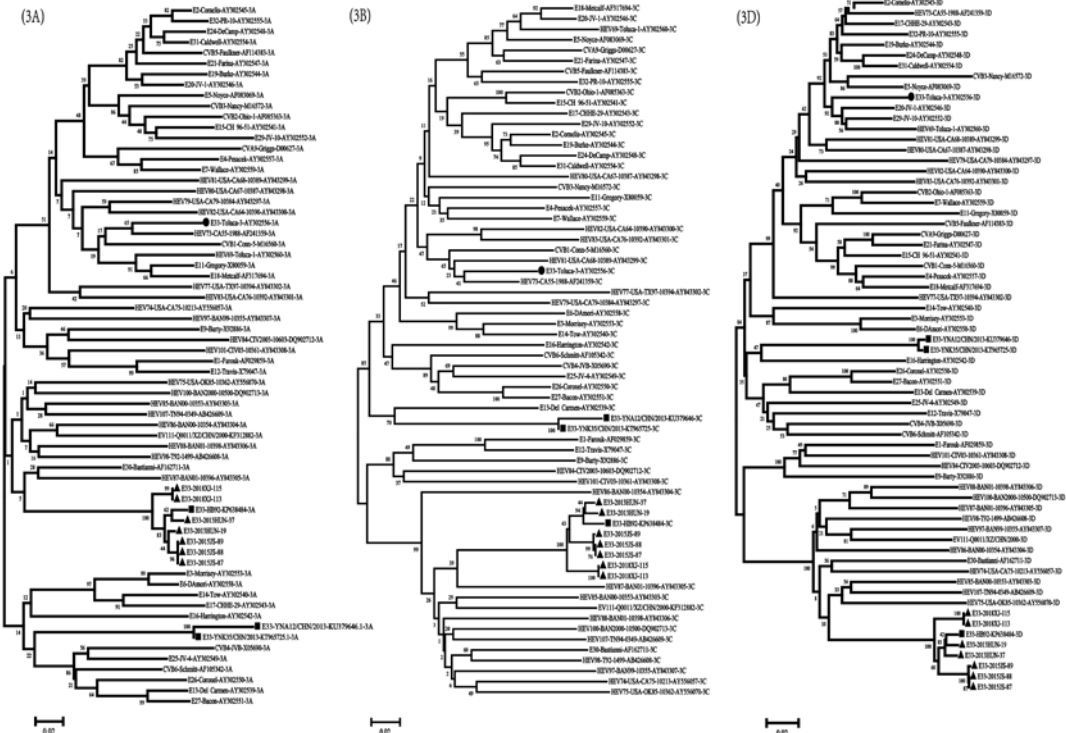

**Figure S3.** NJ trees based on P3 regions of the prototype sequence of all *Enterovirus B* in the GenBank database and seven E33 strains in this study. ● indicates E33 prototype strain (Toluca-3); ▲ indicates 7 strains of E33 in this study ; ■ indicates represents other E33 strains in China. Numbers on codes indicate the bootstrap support of the node (1000 bootstrap replicate percentage). Scale bars represent the genetic distance, and all panels have the same scale. (3A) 3A region sequences; (3B) 3B region sequences; (3C) 3C region sequences.

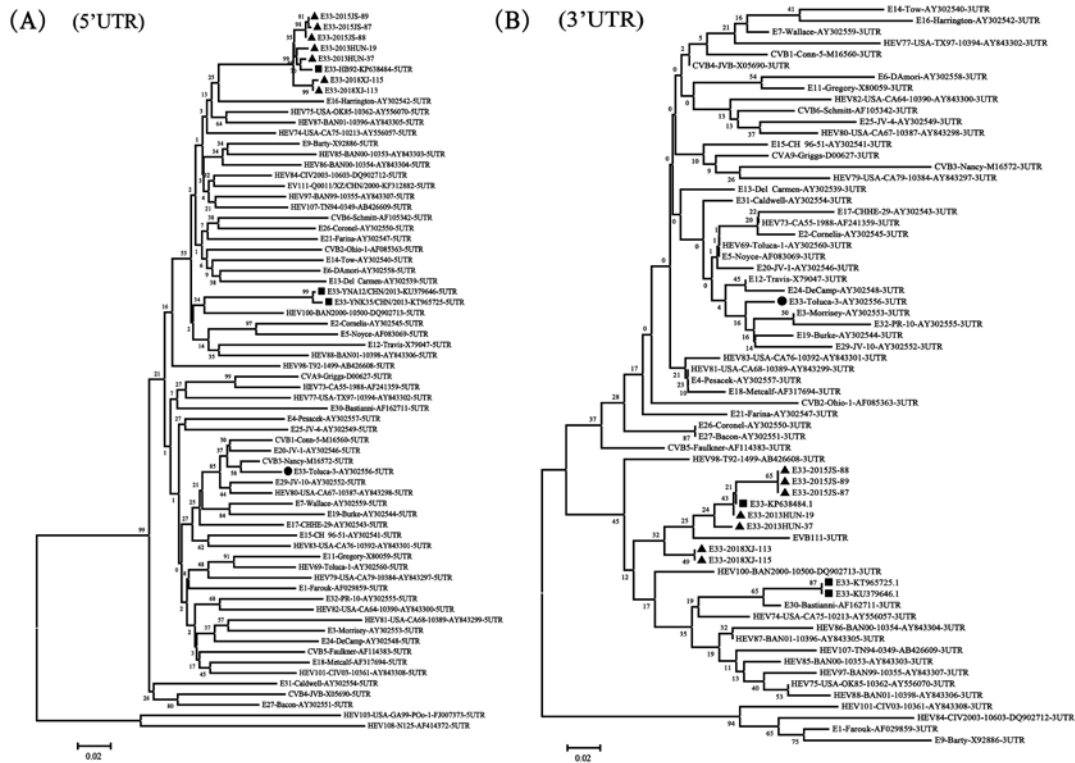

**Figure S4.** NJ trees based on 5'UTR, 3'UTR regions of the prototype sequence of all *Enterovirus B* in the GenBank database and seven E33 strains in this study. ● indicates E33 prototype strain (Toluca-3); ▲ indicates 7 strains of E33 in this study ; ■ indicates represents other E33 strains in China. Numbers on codes indicate the bootstrap support of the node (1000 bootstrap replicate percentage). Scale bars represent the genetic distance, and all panels have the same scale. (A) 5'UTR region sequences; (B) 3'UTR region sequences.





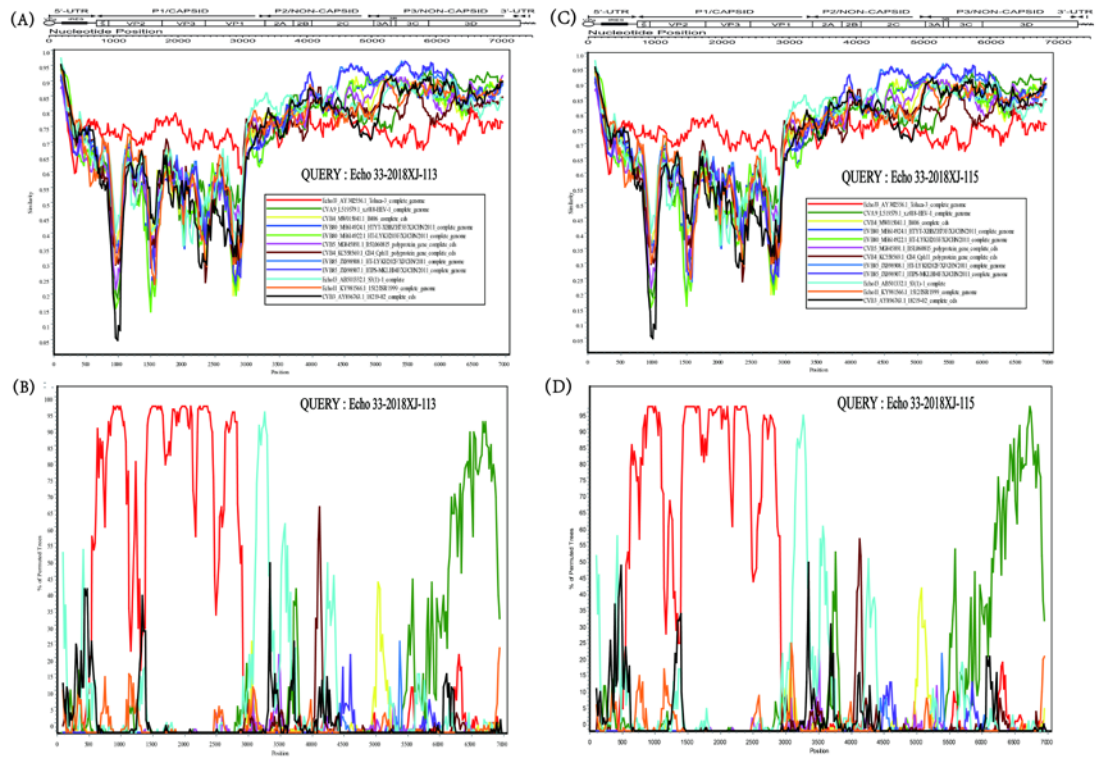

**Figure S7.** Recombination analyses of other two strains in this study. (A), (B) shows separately Simplot and BootScan plot of E33-2018XJ-113 using a sliding window of 200-nt moving in 20-nt steps (C), (D) shows separately Simplot and BootScan plot of E33-2018XJ-115.
